# Supplementary material for: Short-term and long-term impacts of COVID-19 on economic vulnerability: a population-based longitudinal study (COVIDENCE UK)
Source: HighWire-hosted journal article supplement (doi:10.1136/bmjopen-2022-065083), 2022-08-01

## Short- and long-term impacts of COVID-19 on economic vulnerability: a population-based longitudinal study (COVIDENCE UK)

### Supplementary Material

**Table S1: Baseline questionnaire**

| <b>Sociodemographic</b>                                                                                                             |                                                                                                                                                                                                                                                                                                                                                                                                                                                                                                                                                                                                              |
|-------------------------------------------------------------------------------------------------------------------------------------|--------------------------------------------------------------------------------------------------------------------------------------------------------------------------------------------------------------------------------------------------------------------------------------------------------------------------------------------------------------------------------------------------------------------------------------------------------------------------------------------------------------------------------------------------------------------------------------------------------------|
| Date of birth (DD/MM/YYYY)                                                                                                          |                                                                                                                                                                                                                                                                                                                                                                                                                                                                                                                                                                                                              |
| Date of questionnaire (DD/MM/YYYY)                                                                                                  |                                                                                                                                                                                                                                                                                                                                                                                                                                                                                                                                                                                                              |
| Post code                                                                                                                           |                                                                                                                                                                                                                                                                                                                                                                                                                                                                                                                                                                                                              |
| Please state your <b>assigned sex at birth</b> .                                                                                    | - Male<br>- Female                                                                                                                                                                                                                                                                                                                                                                                                                                                                                                                                                                                           |
| What is your ethnic origin?                                                                                                         | - White<br>- English / Welsh / Scottish / Northern Irish / British<br>- Irish<br>- Gypsy or Irish Traveller<br>- Any other white background<br>- Mixed / Multiple ethnic groups<br>- White and Black Caribbean<br>- White and Black African<br>- White and Asian<br>- Any other Mixed / Multiple ethnic backgrounds<br>- Asian / Asian British<br>- Indian<br>- Pakistani<br>- Bangladeshi<br>- Chinese<br>- Any other Asian background<br>- Black / African / Caribbean / Black British<br>- African<br>- Caribbean<br>- Any other Black / African / Caribbean background<br>- Arab<br>- Other Ethnic Group |
| In the last month, was your household income sufficient to cover the basic needs of your household, such as food and heating?       | - Yes<br>- Mostly<br>- Sometimes<br>- No                                                                                                                                                                                                                                                                                                                                                                                                                                                                                                                                                                     |
| Please select the box that best describes your current housing situation:                                                           | - I own my home outright<br>- I own my home and I am paying a mortgage<br>- I am renting privately<br>- I am renting from the council/housing association<br>- I am staying with friends or family<br>- I am homeless or living in temporary accommodation<br>- Other                                                                                                                                                                                                                                                                                                                                        |
| Do you currently claim Universal Credit?                                                                                            | - Yes, I have applied to receive Universal Credit but have <b>not yet</b> received any payments<br>- Yes, I have claimed Universal Credit and received <b>one or more</b> payments<br>- No                                                                                                                                                                                                                                                                                                                                                                                                                   |
| Which of the following best describes your current occupational status?                                                             | - Employed<br>- Self-employed<br>- Retired<br>- Furloughed<br>- Unemployed<br>- Student<br>- Never employed<br>- Not working due to sickness/disability or illness<br>- Other                                                                                                                                                                                                                                                                                                                                                                                                                                |
| Over the last 12 months, would you say that on the whole, your health has been:                                                     | - Excellent<br>- Very good<br>- Good<br>- Fair<br>- Poor                                                                                                                                                                                                                                                                                                                                                                                                                                                                                                                                                     |
| Since February 1st 2020, have you had a nose/throat swab to test for COVID-19?                                                      | - Yes<br>- No                                                                                                                                                                                                                                                                                                                                                                                                                                                                                                                                                                                                |
| On what date did you have this nose/throat swab?<br>If you are not sure of the exact date, enter the approximate date (DD/MM/YYYY). |                                                                                                                                                                                                                                                                                                                                                                                                                                                                                                                                                                                                              |

---

e.g. 25/04/2020

---

|                      |             |
|----------------------|-------------|
| What was the result? | - Positive  |
|                      | - Negative  |
|                      | - Not known |

---

## Table S2: Monthly follow-up questionnaire

### Questions asked at every monthly follow-up

|                                                                                                                                                                                                                                                                                                                                                                                                                                         |                                                                                                                                                                                                                                                                                                                                                        |
|-----------------------------------------------------------------------------------------------------------------------------------------------------------------------------------------------------------------------------------------------------------------------------------------------------------------------------------------------------------------------------------------------------------------------------------------|--------------------------------------------------------------------------------------------------------------------------------------------------------------------------------------------------------------------------------------------------------------------------------------------------------------------------------------------------------|
| Since you last checked in with us, have you had a nose or throat swab for COVID-19 or any other respiratory virus, or has a result from a previous swab test become newly available?(This question is about tests to detect the virus itself: they are usually done in somebody who has symptoms, but screening of asymptomatic people can also be done. It's usually a nose/throat swab, but saliva tests are also becoming available) | - Yes<br>- No                                                                                                                                                                                                                                                                                                                                          |
| On what date did you have this nose / throat swab? If you are not sure of the exact date, enter the approximate date (DD/MM/YYYY).                                                                                                                                                                                                                                                                                                      |                                                                                                                                                                                                                                                                                                                                                        |
| What was the result? Click as many as apply.                                                                                                                                                                                                                                                                                                                                                                                            | - Positive for COVID-19 (SARS-CoV-2 coronavirus)<br>- Positive for influenza virus<br>- Positive for another respiratory virus<br>- Negative for all/any viruses tested<br>- Not Known                                                                                                                                                                 |
| Did you go to hospital for treatment of these symptoms?                                                                                                                                                                                                                                                                                                                                                                                 | - Yes, and I was admitted to hospital (i.e. I spent one or more nights as a hospital in-patient)<br>- Yes, I attended a hospital accident and emergency department but I was not admitted to hospital (i.e. I went home without spending one or more nights as a hospital in-patient)<br>- No, I didn't go to hospital for treatment of these symptoms |
| What did the hospital doctors diagnose?                                                                                                                                                                                                                                                                                                                                                                                                 | - Suspected or proven COVID-19<br>- Something else                                                                                                                                                                                                                                                                                                     |
| Would YOU say that you currently have 'long COVID', i.e. ongoing symptoms more than four weeks after the onset of proven or suspected COVID-19?                                                                                                                                                                                                                                                                                         | - Yes<br>- No<br>- Don't know/not sure                                                                                                                                                                                                                                                                                                                 |
| Since you last checked in with us, has your household income been sufficient to cover the basic needs of your household, such as food and heating?                                                                                                                                                                                                                                                                                      | - Yes<br>- Mostly<br>- Sometimes<br>- No                                                                                                                                                                                                                                                                                                               |
| Has your employment status changed since you last checked in with us?                                                                                                                                                                                                                                                                                                                                                                   | - Yes<br>- No                                                                                                                                                                                                                                                                                                                                          |
| Which of the following best describes your current occupational status?                                                                                                                                                                                                                                                                                                                                                                 | - Employed<br>- Self-employed<br>- Retired<br>- Furloughed<br>- Unemployed<br>- Student<br>- Never employed<br>- Not working due to sickness/disability or illness<br>- Other                                                                                                                                                                          |

---

**Table 3: Summary of participant response numbers for monthly-varying independent and dependent variables**

|                                 | Reponses                     | Number Participants (%) |
|---------------------------------|------------------------------|-------------------------|
| <b>Dependent Variables</b>      |                              |                         |
| Income sufficient               | No                           | 7310 (43.3%)            |
|                                 | Yes                          | 9600 (64.7%)            |
| Not working due to sickness     | Yes                          | 398 (2.4%)              |
|                                 | No                           | 16,512 (97.6%)          |
| <b>Independent Variables</b>    |                              |                         |
| Incident COVID-19               | Yes                          | 1120 (6.6%)             |
|                                 | No                           | 15,790 (93.4%)          |
| Self-reported 'long COVID'      | 'Long COVID'                 | 308 (1.8%)              |
|                                 | COVID-19, never 'long COVID' | 812 (4.8%)              |
|                                 | No COVID-19                  | 15,790 (93.4%)          |
| Hospitalisation due to COVID-19 | COVID-19, hospitalised       | 39 (0.2%)               |
|                                 | COVID-19, never hospitalised | 1089 (6.5%)             |
|                                 | No COVID-19 (ref)            | 15,782 (93.3%)          |

<sup>1</sup>Participant numbers are reported here based on whether they EVER report the answer of interest during follow-up. For income sufficiency, they are coded as 'no' if they answer 'no', 'sometimes' or 'mostly' at least once during follow-up. For sickness absence, incident COVID-19, 'long COVID', and hospitalisation, they are coded as 'yes' if they 'yes' for the relevant variable at least once during follow-up.

**Figure S1: Participant flow diagram**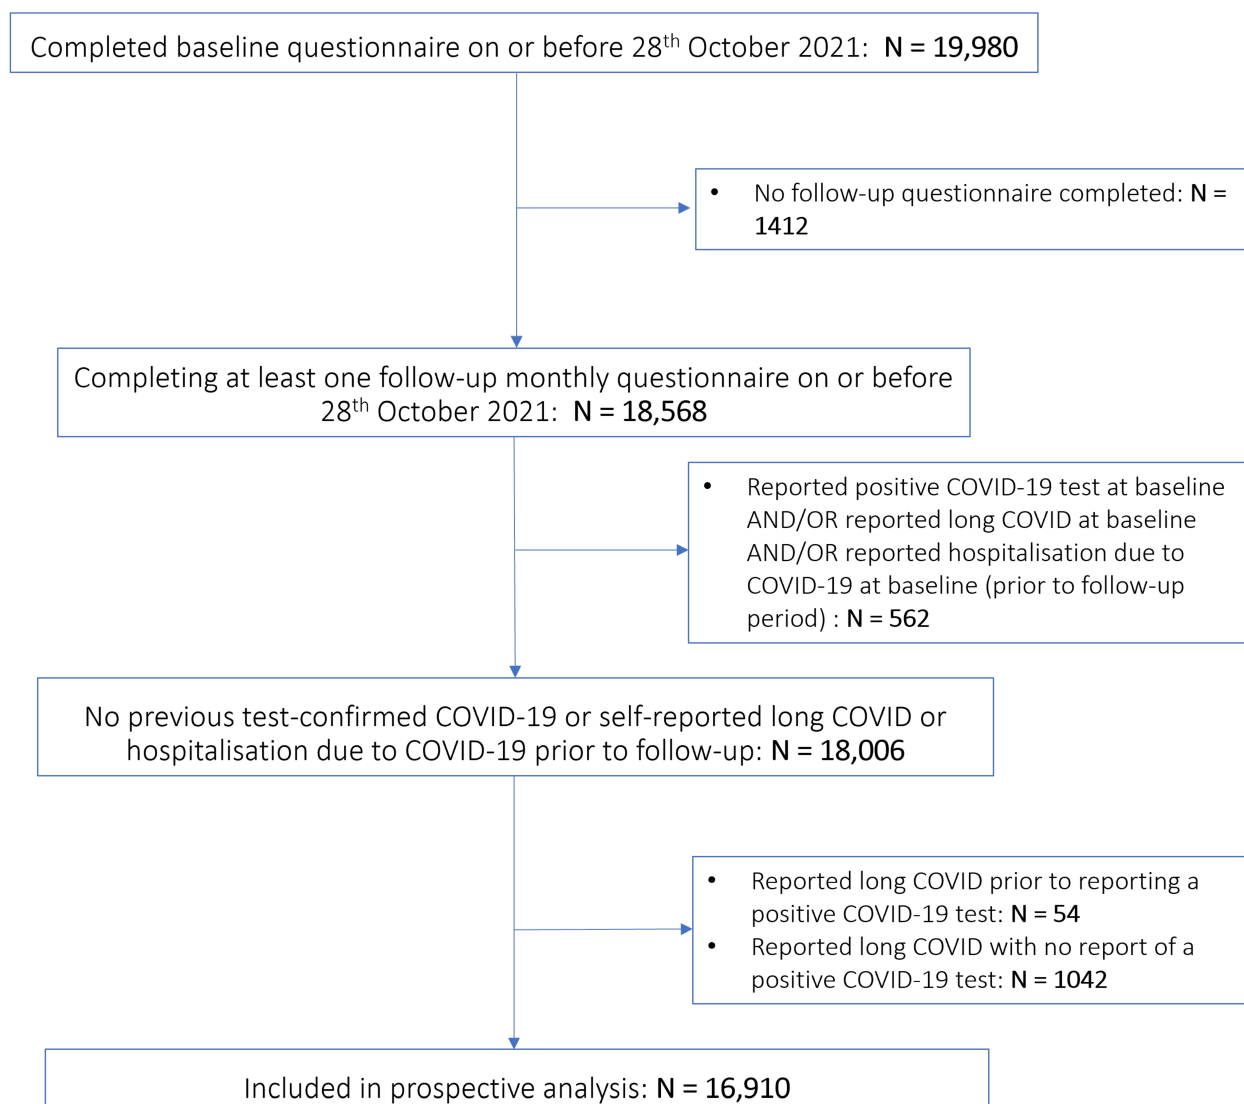

Supplement: bmjopen-2022-065083supp001_data_supplement.pdf [file bmjopen-2022-065083supp001_data_supplement.pdf]
